# Supplementary material for: Predicting the final grade using a machine learning regression model: insights from fifty percent of total course grades in CS1 courses
Source: PeerJ journal article supplement (doi:10.7717/peerj-cs.1689), 2023-12-11
Supplement: Guia_consentimiento_informado.pdf [file Guia_consentimiento_informado.pdf]

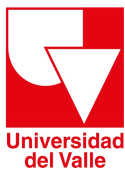

## CONSENTIMIENTO INFORMADO

NOMBRE DEL PROYECTO

CÓDIGO DEL PARTICIPANTE \_\_\_\_\_, (*Este mismo código aparece en el consentimiento que autoriza la participación*)

Lo invitamos a participar en una investigación para \_\_OBJETIVO\_\_, con usted participarán \_\_No\_\_ estudiantes; lo que haremos es \_\_DESCRIBIR EN QUE CONSISTE LA PARTICIPACIÓN LISTANDO CLARAMENTE TODOS PROCEDIMIENTOS DEL ESTUDIO \_\_, todo se hará en \_\_\_\_\_ horas, como su participación es voluntaria debe realizar todas las actividades de lo contrario se retirará del estudio, en caso que no desees continuar puedes decir que no quieres y retirarse sin ningún problema ni explicación.

Garantizamos que su nombre ni datos personales serán mostrados ya que de aquí en adelante solo se identificará con el código asignado en la parte superior.

Es posible que \_\_MENCIONAR LOS RIESGOS\_\_, nosotros para evitarlo \_\_\_\_\_ contamos con el personal \_\_DESCRIPCIÓN SEGÚN EL ESTUDIO\_\_ adecuado para solucionarlo.

Los beneficios que obtendrás serán \_\_\_\_\_, debe saber que no incurrirá en ningún gasto.

Acepto participar Si\_\_ No\_\_

Le daremos una copia de este documento.

Nombre del participante:

CC:

Nombre de quien presentó el consentimiento informado:

CC:

Se firma en Cali, a los \_\_\_\_ del mes de \_\_\_\_\_ del 202\_\_.
